# Supplementary material
Source: PubMed Central journal article supplement (PMC1065346)
Supplement: plntphys_137_2_428__5.pdf [file plntphys_137_2_428__5.pdf]

**Table S4. EST clones corresponding to the identified metal transporters in *C. reinhardtii*.** Columns 1 to 5 contain protein name, JGI identification number (transcript), number of EST clones found, distribution of the EST clones among the various cDNA libraries (described in Asamizu et al., 1999; Asamizu et al., 2000; Shrager et al., 2003) and EST clone identification or accession numbers. CrMRP1 (AAL35383), CrCds1 (AAQ19847) and CrFTR1 (AAM45938) have been named previously (Im et al., 2002; Hanikenne et al., in press; Lafontaine et al., 2002).

| protein name          | JGI id | No of EST clones | clone library associations                                                                                                                           | clone ids                                                                                                                |
|-----------------------|--------|------------------|------------------------------------------------------------------------------------------------------------------------------------------------------|--------------------------------------------------------------------------------------------------------------------------|
| <b>CDF family</b>     |        |                  |                                                                                                                                                      |                                                                                                                          |
| CrMTP1                | 168519 | 3                | CGP stress II (3)                                                                                                                                    | 1031014E07 1031024E10<br>1031043H12                                                                                      |
| CrMTP2                | 153887 | 4                | CGP deflagellation (2)<br>CGP stress II (2)                                                                                                          | 1030108D02 1030116G02<br>1031058A01 1031095G10                                                                           |
| CrMTP3                | 153892 | –                | –                                                                                                                                                    | –                                                                                                                        |
| CrMTP4                | 154037 | –                | –                                                                                                                                                    | –                                                                                                                        |
| CrMTP5                | 162326 | 1                | Kazusa phototrophic growth (1)                                                                                                                       | AV394737                                                                                                                 |
| <b>ZIP family</b>     |        |                  |                                                                                                                                                      |                                                                                                                          |
| CrZIP1                | 153077 | –                | –                                                                                                                                                    | –                                                                                                                        |
| CrZIP2                | 157106 | 1                | Kazusa 5% CO <sub>2</sub> (1)                                                                                                                        | AV643607                                                                                                                 |
| CrZIP3                | 160009 | –                | –                                                                                                                                                    | –                                                                                                                        |
| CrZIP4                | 171817 | –                | –                                                                                                                                                    | –                                                                                                                        |
| CrZIP5                | 171818 | 4                | Kazusa 5% to 0.04% CO <sub>2</sub> (3)<br>Kazusa various conditions (1)                                                                              | AV626863 AV630346 AV630909<br>BP094353                                                                                   |
| CrZIP6                | 158835 | 3                | CGP stress II (1)<br>CGP core (1)<br>CGP stress I (1)                                                                                                | 1031047D02 894089H08<br>963048F03                                                                                        |
| CrZIP7                | 167842 | 1                | CGP gamete-zygote (1)                                                                                                                                | 1112107H03                                                                                                               |
| CrZIP8                | 164608 | 2                | CGP stress II (1)<br>Kazusa various conditions (1)                                                                                                   | 1031063G09 BP091787                                                                                                      |
| CrZIP9                | 153825 | 5                | CGP stress I (2)<br>CGP gamete-zygote (1)<br>Kazusa 5% CO <sub>2</sub> (1)<br>Kazusa phototrophic growth (1)                                         | 1112014A05 963092G11<br>963097F02 AV389034 AV635915                                                                      |
| CrZIP10               | 164248 | 1                | CGP gamete-zygote (1)                                                                                                                                | 1112001F12                                                                                                               |
| CrZIP11               | 164249 | 1                | CGP stress II (1)                                                                                                                                    | 1031112C12                                                                                                               |
| CrZIP12               | 171130 | –                | –                                                                                                                                                    | –                                                                                                                        |
| CrZIP13 putative      | 159981 | 2                | CGP stress II (1)<br>Kazusa 5% to 0.04% CO <sub>2</sub> (1)                                                                                          | 1031014C12 AV625751                                                                                                      |
| CrZIP14 putative      | 164406 | –                | –                                                                                                                                                    | –                                                                                                                        |
| <b>CAX family</b>     |        |                  |                                                                                                                                                      |                                                                                                                          |
| CrCAX1                | 157233 | 11               | Kazusa various conditions (3)<br>CGP stress III (2)<br>Kazusa 5% CO <sub>2</sub> (2)<br>CGP core (2)<br>CGP core subtracted (1)<br>CGP stress II (1) | 1024053A12 1031095E12<br>1115056E06 1115059D08<br>894082C07 894093E03 AV641018<br>AV641025 BP091238 BP093743<br>BP095263 |
| CrCAX2                | 166617 | 3                | CGP core subtracted (1)<br>CGP gamete-zygote (1)<br>CGP core (1)                                                                                     | 1024007G07 1112024E07<br>894064A11                                                                                       |
| CrCAX3                | 158919 | –                | –                                                                                                                                                    | –                                                                                                                        |
| CrCAX1                | 157233 | 11               | Kazusa various conditions (3)<br>CGP stress III (2)<br>Kazusa 5% CO <sub>2</sub> (2)<br>CGP core (2)<br>CGP core subtracted (1)<br>CGP stress II (1) | 1024053A12 1031095E12<br>1115056E06 1115059D08<br>894082C07 894093E03 AV641018<br>AV641025 BP091238 BP093743<br>BP095263 |
| <b>COPT family</b>    |        |                  |                                                                                                                                                      |                                                                                                                          |
| CrCOPT1               | 163944 | –                | –                                                                                                                                                    | –                                                                                                                        |
| <b>P-Type ATPases</b> |        |                  |                                                                                                                                                      |                                                                                                                          |
| <i>HMA subfamily</i>  |        |                  |                                                                                                                                                      |                                                                                                                          |
| CrHMA1                | 159065 | 1                | Kazusa various conditions (1)                                                                                                                        | BP098615                                                                                                                 |
| CrHMA2                | 168288 | 1                | CGP core subtracted (1)                                                                                                                              | 1024007C06                                                                                                               |
| CrHMA3                | 161566 | –                | –                                                                                                                                                    | –                                                                                                                        |

(continued on next page)

(continued from previous page)

| protein name                  | JGI id | No of EST clones | clone library associations                                                                                                                                                                                                                 | clone ids                                                                                                                                                                                                                                    |
|-------------------------------|--------|------------------|--------------------------------------------------------------------------------------------------------------------------------------------------------------------------------------------------------------------------------------------|----------------------------------------------------------------------------------------------------------------------------------------------------------------------------------------------------------------------------------------------|
| <b>ABC transporter family</b> |        |                  |                                                                                                                                                                                                                                            |                                                                                                                                                                                                                                              |
| <i>MRP subfamily</i>          |        |                  |                                                                                                                                                                                                                                            |                                                                                                                                                                                                                                              |
| CrMRP1                        | –      | 21               | CGP gamete-zygote (5)<br>Kazusa various conditions (5)<br>CGP core (3)<br>CGP deflagellation (2)<br>CGP stress II (2)<br>CGP stress III (1)<br>Kazusa 5% CO <sub>2</sub> (1)<br>Kazusa 5% to 0.04% CO <sub>2</sub> (1)<br>CGP stress I (1) | 1030067C05 1030067C06<br>1031002H06 1031026A10<br>1112032C03 1112050E06<br>1112100B10 1112118A04<br>1112118H12 1115043D12<br>894007C07 894011A09 894100E10<br>963043G03 BP086819 BP093055<br>BP093289 BP093659 BP094501<br>BP383735 BP383829 |
| CrMRP2                        | 153344 | 16               | Kazusa various conditions (8)<br>CGP stress II (2)<br>CGP gamete-zygote (2)<br>CGP core subtracted (1)<br>CGP deflagellation (1)<br>Kazusa 5% to 0.04% CO <sub>2</sub> (1)<br>CGP stress I (1)                                             | 1024120H11 1030043E07<br>1031023G08 1031094D07<br>1112097H07 1112132E11<br>963087H06 BP093919 BP094156<br>BP095351 BP095767 BP096456<br>BP096863 BP098472 BP098571<br>BP383837                                                               |
| CrMRP3                        | 166481 | 2                | Kazusa 5% to 0.04% CO <sub>2</sub> (1)<br>Kazusa phototrophic growth (1)                                                                                                                                                                   | AV395734 AV629725                                                                                                                                                                                                                            |
| CrMRP4                        | 165660 | –                | –                                                                                                                                                                                                                                          | –                                                                                                                                                                                                                                            |
| CrMRP5                        | 162457 | –                | –                                                                                                                                                                                                                                          | –                                                                                                                                                                                                                                            |
| CrMRP6                        | –      | 2                | CGP stress II (1)<br>CGP gamete-zygote (1)                                                                                                                                                                                                 | 1031023E03 1112084E06                                                                                                                                                                                                                        |
| CrMRP7                        | 160938 | –                | –                                                                                                                                                                                                                                          | –                                                                                                                                                                                                                                            |
| <i>ATM/HMT subfamily</i>      |        |                  |                                                                                                                                                                                                                                            |                                                                                                                                                                                                                                              |
| CrCds1                        | –      | 7                | CGP stress II (3)<br>CGP gamete-zygote (2)<br>Kazusa various conditions (2)                                                                                                                                                                | 1031005C04 1031017D06<br>1031027E09 1112054E05<br>1112145F05 BP090666 BP096922                                                                                                                                                               |
| CrATM/HMT-2                   | 158975 | –                | –                                                                                                                                                                                                                                          | –                                                                                                                                                                                                                                            |
| CrATM/HMT-3                   | 156620 | –                | –                                                                                                                                                                                                                                          | –                                                                                                                                                                                                                                            |
| <b>FTR family</b>             |        |                  |                                                                                                                                                                                                                                            |                                                                                                                                                                                                                                              |
| CrFTR1                        | 164771 | 9                | Kazusa various conditions (4)<br>Kazusa phototrophic growth (2)<br>CGP deflagellation (1)<br>CGP stress II (1)<br>Kazusa 5% to 0.04% CO <sub>2</sub> (1)                                                                                   | 1030071F12 1031107C11<br>AV386548 AV395492 AV631148<br>BP094313 BP095313 BP095713<br>BP098790                                                                                                                                                |
| <b>NRAMP family</b>           |        |                  |                                                                                                                                                                                                                                            |                                                                                                                                                                                                                                              |
| CrNRAMP1                      | 157858 | 13               | CGP gamete-zygote (3)<br>CGP stress II (2)<br>CGP core (2)<br>CGP stress I (2)<br>CGP core subtracted (1)<br>Kazusa 5% to 0.04% CO <sub>2</sub> (1)<br>Kazusa phototrophic growth (1)<br>Kazusa various conditions (1)                     | 1024064D08 1031008E03<br>1031104C12 1112076C02<br>1112097C06 1112125E05<br>894062H08 894067D09 963082B12<br>963095H05 AV389837 AV625564<br>BP091649                                                                                          |
| CrNRAMP2                      | 167153 | –                | –                                                                                                                                                                                                                                          | –                                                                                                                                                                                                                                            |
| CrNRAMP3                      | 165437 | –                | –                                                                                                                                                                                                                                          | –                                                                                                                                                                                                                                            |
