# Supplementary material
Source: PubMed Central journal article supplement (PMC1065346)
Supplement: plntphys_137_2_428__6.pdf [file plntphys_137_2_428__6.pdf]

**Table S5. EST clones corresponding to the identified metal transporters in *C. merolae*.** Columns 1 to 4 contain protein name, protein identification number, number of EST clones found and EST clone identification numbers.

| protein name                  | protein id | No of EST clones | clone ids                                                                                                                                                                                                                                                                                                                                                                                                                                                                                                                                                                                                                                                                                                                                                                                                                                                                         |
|-------------------------------|------------|------------------|-----------------------------------------------------------------------------------------------------------------------------------------------------------------------------------------------------------------------------------------------------------------------------------------------------------------------------------------------------------------------------------------------------------------------------------------------------------------------------------------------------------------------------------------------------------------------------------------------------------------------------------------------------------------------------------------------------------------------------------------------------------------------------------------------------------------------------------------------------------------------------------|
| <b>CDF family</b>             |            |                  |                                                                                                                                                                                                                                                                                                                                                                                                                                                                                                                                                                                                                                                                                                                                                                                                                                                                                   |
| CmMTP1                        | CMF058C    | 1                | sz79i13                                                                                                                                                                                                                                                                                                                                                                                                                                                                                                                                                                                                                                                                                                                                                                                                                                                                           |
| CmMTP2                        | CMC075C    | 2                | sz11c12 sz33d22                                                                                                                                                                                                                                                                                                                                                                                                                                                                                                                                                                                                                                                                                                                                                                                                                                                                   |
| CmMTP3                        | CMT536C    | 1                | sz95k13                                                                                                                                                                                                                                                                                                                                                                                                                                                                                                                                                                                                                                                                                                                                                                                                                                                                           |
| <b>ZIP family</b>             |            |                  |                                                                                                                                                                                                                                                                                                                                                                                                                                                                                                                                                                                                                                                                                                                                                                                                                                                                                   |
| CmZIP1                        | CMS155C    | 7                | sz13c17 sz2c22 sz33o09 sz34m07 sz40k24 sz43h13 sz50e02                                                                                                                                                                                                                                                                                                                                                                                                                                                                                                                                                                                                                                                                                                                                                                                                                            |
| CmZIP2                        | CMG102C    | –                | –                                                                                                                                                                                                                                                                                                                                                                                                                                                                                                                                                                                                                                                                                                                                                                                                                                                                                 |
| CmZIP3 GUFA                   | CMQ444C    | 5                | sz2o12 sz67d11 sz83111 sz8i24 sz98l08                                                                                                                                                                                                                                                                                                                                                                                                                                                                                                                                                                                                                                                                                                                                                                                                                                             |
| CmZIP4 LIV1                   | CMP282C    | 8                | sz41m14 sz54m24 sz56o01 sz59d19 sz70b02 sz86p06 sz89c24 sz92119                                                                                                                                                                                                                                                                                                                                                                                                                                                                                                                                                                                                                                                                                                                                                                                                                   |
| <b>CAX family</b>             |            |                  |                                                                                                                                                                                                                                                                                                                                                                                                                                                                                                                                                                                                                                                                                                                                                                                                                                                                                   |
| CmCAX1                        | CMQ284C    | 3                | sz14g23 sz59i17 sz9h24                                                                                                                                                                                                                                                                                                                                                                                                                                                                                                                                                                                                                                                                                                                                                                                                                                                            |
| CmCAX2                        | CMR378C    | 2                | sz46a07 sz4g04                                                                                                                                                                                                                                                                                                                                                                                                                                                                                                                                                                                                                                                                                                                                                                                                                                                                    |
| <b>COPT family</b>            |            |                  |                                                                                                                                                                                                                                                                                                                                                                                                                                                                                                                                                                                                                                                                                                                                                                                                                                                                                   |
| CmCOPT1                       | CMS307C    | 7                | sz14d05/sz27118/sz39a10/sz46d18/sz60j21/sz60o03/sz66l01                                                                                                                                                                                                                                                                                                                                                                                                                                                                                                                                                                                                                                                                                                                                                                                                                           |
| <b>P-Type ATPases</b>         |            |                  |                                                                                                                                                                                                                                                                                                                                                                                                                                                                                                                                                                                                                                                                                                                                                                                                                                                                                   |
| <i>HMA subfamily</i>          |            |                  |                                                                                                                                                                                                                                                                                                                                                                                                                                                                                                                                                                                                                                                                                                                                                                                                                                                                                   |
| CmHMA1                        | CMS330C    | –                | –                                                                                                                                                                                                                                                                                                                                                                                                                                                                                                                                                                                                                                                                                                                                                                                                                                                                                 |
| CmHMA2                        | CMP215C    | 9                | sz21i23 sz31g18 sz33j12 sz41l13 sz42j15 sz43i07 sz50f24 sz54l06 sz86h24                                                                                                                                                                                                                                                                                                                                                                                                                                                                                                                                                                                                                                                                                                                                                                                                           |
| <b>ABC transporter family</b> |            |                  |                                                                                                                                                                                                                                                                                                                                                                                                                                                                                                                                                                                                                                                                                                                                                                                                                                                                                   |
| <i>MRP subfamily</i>          |            |                  |                                                                                                                                                                                                                                                                                                                                                                                                                                                                                                                                                                                                                                                                                                                                                                                                                                                                                   |
| CmMRP1                        | CMN251C    | 2                | sz22k24 sz73l15                                                                                                                                                                                                                                                                                                                                                                                                                                                                                                                                                                                                                                                                                                                                                                                                                                                                   |
| CmMRP2                        | CMD133C    | 2                | sz7f07 sz93e19                                                                                                                                                                                                                                                                                                                                                                                                                                                                                                                                                                                                                                                                                                                                                                                                                                                                    |
| <i>ATM/HMT subfamily</i>      |            |                  |                                                                                                                                                                                                                                                                                                                                                                                                                                                                                                                                                                                                                                                                                                                                                                                                                                                                                   |
| CmATM/HMT-1                   | CMN105C    | 1                | sz7n19                                                                                                                                                                                                                                                                                                                                                                                                                                                                                                                                                                                                                                                                                                                                                                                                                                                                            |
| CmATM/HMT-2                   | CMQ176C    | 3                | sz34d17 sz75c20 sz87f18                                                                                                                                                                                                                                                                                                                                                                                                                                                                                                                                                                                                                                                                                                                                                                                                                                                           |
| CmATM/HMT-3                   | CMT066C    | 7                | sz29f08 sz43b17 sz49m21 sz63l04 sz6n12 sz78l01 sz96c18                                                                                                                                                                                                                                                                                                                                                                                                                                                                                                                                                                                                                                                                                                                                                                                                                            |
| <b>FTR family</b>             |            |                  |                                                                                                                                                                                                                                                                                                                                                                                                                                                                                                                                                                                                                                                                                                                                                                                                                                                                                   |
| CmFTR1                        | CMJ315C    | 40               | sz16i15 sz17o04 sz18j11 sz18o23 sz1l21 sz20f22 sz23l05 sz25d14 sz26e22 sz26p04 sz29i17 sz2j17 sz34o02 sz40g10 sz41m07 sz42c04 sz42o07 sz43f23 sz45m08 sz45m18 sz49c01 sz54o16 sz59b05 sz5h06 sz60f19 sz60h04 sz64e05 sz69i14 sz69l23 sz6m03 sz71m20 sz73o06 sz75i14 sz86f12 sz86i18 sz87j14 sz88c08 sz92d03 sz96f20 sz98a02 sz100l06 sz100m15 sz11g22 sz12c22 sz15l03 sz15p03 sz16g14 sz17c12 sz17m14 sz17p08 sz19d15 sz19p10 sz1d21 sz20m10 sz21l11 sz25l23 sz26o18 sz29i06 sz2n03 sz31f22 sz31n19 sz33j04 sz34b15 sz36m08 sz37p09 sz38c06 sz40b07 sz40l22 sz46c21 sz46l01 sz47b14 sz47i22 sz50e21 sz50j23 sz50o22 sz52l07 sz54d03 sz60g22 sz62e20 sz62f24 sz62o09 sz63g04 sz64i17 sz67p09 sz6o10 sz70h21 sz71g06 sz72f01 sz72k24 sz75i06 sz77c08 sz77l04 sz78n07 sz79c19 sz7m13 sz85e05 sz88e10 sz88m24 sz89l21 sz90h23 sz90o13 sz94k05 sz96f17 sz96j12 sz97d18 sz97h09 sz99e19 |
| CmFTR2                        | CML004C    | 67               | sz12p03 sz23j08 sz33f04 sz3o04 sz57o19 sz5e02 sz64h19 sz67m12 sz68a02 sz71c02 sz84g02 sz84m03 sz86o22 sz97m18 sz42o19                                                                                                                                                                                                                                                                                                                                                                                                                                                                                                                                                                                                                                                                                                                                                             |
| CmFTR3                        | CMQ004C    | 14               | sz12p03 sz23j08 sz33f04 sz3o04 sz57o19 sz5e02 sz64h19 sz67m12 sz68a02 sz71c02 sz84g02 sz84m03 sz86o22 sz97m18                                                                                                                                                                                                                                                                                                                                                                                                                                                                                                                                                                                                                                                                                                                                                                     |
| CmFTR4                        | CMN003C    | 1                | sz42o19                                                                                                                                                                                                                                                                                                                                                                                                                                                                                                                                                                                                                                                                                                                                                                                                                                                                           |
| <b>NRAMP family</b>           |            |                  |                                                                                                                                                                                                                                                                                                                                                                                                                                                                                                                                                                                                                                                                                                                                                                                                                                                                                   |
| CmNRAMP1                      | CMJ138C    | 11               | sz1p16 sz23d20 sz25a08 sz30n21 sz38l09 sz54j01 sz58h16 sz65l24 sz71g08 sz74p03 sz88f16                                                                                                                                                                                                                                                                                                                                                                                                                                                                                                                                                                                                                                                                                                                                                                                            |
| CmNRAMP2                      | CML262C    | 4                | sz11h13 sz39l18 sz43b17 sz60a24                                                                                                                                                                                                                                                                                                                                                                                                                                                                                                                                                                                                                                                                                                                                                                                                                                                   |
| CmNRAMP3                      | CMT180C    | 6                | sz21a14 sz45l14 sz51d23 sz55o04 sz58i03 sz60k01                                                                                                                                                                                                                                                                                                                                                                                                                                                                                                                                                                                                                                                                                                                                                                                                                                   |
| <b>IREG1 family</b>           |            |                  |                                                                                                                                                                                                                                                                                                                                                                                                                                                                                                                                                                                                                                                                                                                                                                                                                                                                                   |
| CmIREG1                       | CMG212C    | 1                | sz11f24                                                                                                                                                                                                                                                                                                                                                                                                                                                                                                                                                                                                                                                                                                                                                                                                                                                                           |
