# Supplementary material
Source: PubMed Central journal article supplement (PMC1065346)
Supplement: plntphys_137_2_428__7.pdf [file plntphys_137_2_428__7.pdf]

**Table S6. Structural features and subcellular localization of the identified metal transporters in *C. reinhardtii*.** Columns 1 to 6 contain protein name, JGI identification number (transcript), number of transmembrane (TM) domains as predicted by TMHMM software, subcellular localization predicted by either iPSORT or TargetP, along with TargetP reliability class (RC ; from 1 to 5 ; 1 being the highest reliability). CrMRP1 (AAL35383), CrCds1 (AAQ19847) and CrFTR1 (AAM45938) have been named previously (Im et al., 2002; Hanikenne et al., in press; Lafontaine et al., 2002).

| <b>protein name</b>           | <b>JGI id</b> | <b>No of TM domains</b> | <b>iPSORT prediction</b> | <b>TargetP prediction</b> | <b>TargetP RC</b> |
|-------------------------------|---------------|-------------------------|--------------------------|---------------------------|-------------------|
| <b>CDF family</b>             |               |                         |                          |                           |                   |
| CrMTP1                        | 168519        | 6                       | vacuole                  | vacuole                   | 3                 |
| CrMTP2                        | 153887        | 5                       | vacuole                  | vacuole                   | 5                 |
| CrMTP3                        | 153892        | 3                       | mitochondrion            | mitochondrion             | 3                 |
| CrMTP4                        | 154037        | 4                       | vacuole                  | vacuole                   | 3                 |
| CrMTP5                        | 162326        | 3                       | chloroplast              | vacuole                   | 5                 |
| <b>ZIP family</b>             |               |                         |                          |                           |                   |
| CrZIP1                        | 153077        | 5                       | mitochondrion            | mitochondrion             | 4                 |
| CrZIP2                        | 157106        | 9                       | vacuole                  | vacuole                   | 1                 |
| CrZIP3                        | 160009        | 6                       | secretory pathway        | secretory pathway         | 3                 |
| CrZIP4                        | 171817        | 5                       | secretory pathway        | vacuole                   | 5                 |
| CrZIP5                        | 171818        | 8                       | vacuole                  | vacuole                   | 1                 |
| CrZIP6                        | 158835        | 8                       | vacuole                  | vacuole                   | 4                 |
| CrZIP7                        | 167842        | 14                      | chloroplast              | secretory pathway         | 5                 |
| CrZIP8                        | 164608        | 6                       | vacuole                  | secretory pathway         | 4                 |
| CrZIP9                        | 153825        | 6                       | secretory pathway        | secretory pathway         | 1                 |
| CrZIP10                       | 164248        | 3                       | vacuole                  | vacuole                   | 4                 |
| CrZIP11                       | 164249        | 8                       | secretory pathway        | secretory pathway         | 2                 |
| CrZIP12                       | 171130        | 5                       | secretory pathway        | secretory pathway         | 2                 |
| CrZIP13 putative              | 159981        | 7                       | mitochondrion            | chloroplast               | 4                 |
| CrZIP14 putative              | 164406        | 0                       | chloroplast              | chloroplast               | 4                 |
| <b>CAX family</b>             |               |                         |                          |                           |                   |
| CrCAX1                        | 157233        | 11                      | vacuole                  | vacuole                   | 4                 |
| CrCAX2                        | 166617        | 5                       | mitochondrion            | mitochondrion             | 5                 |
| CrCAX3                        | 158919        | 7                       | vacuole                  | vacuole                   | 3                 |
| CrCAX4                        | 163085        | 10                      | chloroplast              | vacuole                   | 3                 |
| <b>COPT family</b>            |               |                         |                          |                           |                   |
| CrCOPT1                       | 163944        | 2                       | mitochondrion            | secretory pathway         | 3                 |
| <b>P-Type ATPases</b>         |               |                         |                          |                           |                   |
| <i>HMA subfamily</i>          |               |                         |                          |                           |                   |
| CrHMA1                        | 159065        | 5                       | mitochondrion            | mitochondrion             | 3                 |
| CrHMA2                        | 168288        | 8                       | mitochondrion            | vacuole                   | 5                 |
| CrHMA3                        | 161566        | 6                       | vacuole                  | vacuole                   | 1                 |
| <b>ABC transporter family</b> |               |                         |                          |                           |                   |
| <i>MRP subfamily</i>          |               |                         |                          |                           |                   |
| CrMRP1                        | –             | 8                       | secretory pathway        | secretory pathway         | 4                 |
| CrMRP2                        | 153344        | 11                      | vacuole                  | vacuole                   | 4                 |
| CrMRP3                        | 166481        | 11                      | vacuole                  | mitochondrion             | 3                 |
| CrMRP4                        | 165660        | 11                      | mitochondrion            | chloroplast               | 3                 |
| CrMRP5                        | 162457        | 4                       | chloroplast              | vacuole                   | 4                 |
| CrMRP6                        | –             | 7                       | secretory pathway        | mitochondrion             | 4                 |
| CrMRP7                        | 160938        | 3                       | vacuole                  | vacuole                   | 2                 |
| <i>ATM/HMT subfamily</i>      |               |                         |                          |                           |                   |
| CrCds1                        | –             | 11                      | chloroplast              | vacuole                   | 3                 |
| CrATM/HMT-2                   | 158975        | 5                       | mitochondrion            | mitochondrion             | 3                 |
| CrATM/HMT-3                   | 156620        | 4                       | secretory pathway        | mitochondrion             | 4                 |
| <b>FTR family</b>             |               |                         |                          |                           |                   |
| CrFTR1                        | 164771        | 7                       | secretory pathway        | secretory pathway         | 1                 |
| <b>NRAMP family</b>           |               |                         |                          |                           |                   |
| CrNRAMP1                      | 157858        | 11                      | vacuole                  | vacuole                   | 5                 |
| CrNRAMP2                      | 167153        | 6                       | chloroplast              | vacuole                   | 3                 |
| CrNRAMP3                      | 165437        | 12                      | secretory pathway        | secretory pathway         | 3                 |
